# Supplementary material for: TLR4 is a regulator of trained immunity in a murine model of Duchenne muscular dystrophy
Source: PubMed Central journal article supplement (PMC8847425; doi:10.1038/s41467-022-28531-1), 2022-02-15
Supplement: 41467_2022_28531_MOESM3_ESM.pdf [file 41467_2022_28531_MOESM3_ESM.pdf]

## Description of Additional Supplementary Files

**Supplementary Data 1.** List of genes associated with significantly different histone modification patterns (GP1-GP4) in bone marrow-derived macrophages (BMDM) from wild-type (WT), mdx, and mdxTLR4<sup>-/-</sup> mice. The left and right panels show the histone modification patterns for H3K27me3 and H3K27ac, respectively.

**Supplementary Data 2.** Biological pathway enrichment analysis (Reactome informatics database) and associated gene lists for the different histone modification patterns (GP1-GP4) found in bone marrow-derived macrophages (BMDM) from wild-type (WT), mdx, and mdxTLR4<sup>-/-</sup> mice. The left and right panels show the pathway analysis for H3K27me3 and H3K27ac, respectively.

**Supplementary Data 3.** List of genes selected a priori to reflect potential pro-inflammatory, anti-inflammatory, and pro-fibrotic functions of bone marrow-derived macrophages (BMDM) from wild-type (WT), mdx, and mdxTLR4<sup>-/-</sup> mice.

**Supplementary Data 4.** List of peak regions within the genome exhibiting significantly different histone modification patterns (PP1-PP4) in bone marrow-derived macrophages (BMDM) from wild-type (WT), mdx, and mdxTLR4<sup>-/-</sup> mice. The left and right panels show the peak-based histone modification patterns for H3K27me3 and H3K27ac, respectively.

**Supplementary Data 5.** Transcription factor (TF) pathway enrichment analysis for the dominant peak-based histone modification patterns (PP1-PP2) found in bone marrow-derived macrophages (BMDM) from wild-type (WT), mdx, and mdxTLR4<sup>-/-</sup> mice. The left and right panels show the TF pathway analysis for H3K27me3 and H3K27ac, respectively.

**Supplementary Data 6.** PCR primer sequences used to evaluate mRNA expression or histone modifications of gene promoters for prototypical pro-inflammatory and anti-inflammatory genes.
